# Supplementary material for: Haralick's texture analysis to predict cellular proliferation on randomly oriented electrospun nanomaterials
Source: Royal Society of Chemistry journal article supplement (doi:10.1039/d1na00890k), 2022-01-01
Supplement: d1na00890k1.pdf [file d1na00890k1.pdf]

## SUPPLEMENTARY MATERIALS

### Haralick's texture analysis to predict cellular proliferation onto randomly oriented electrospun nanomaterials

Nora Bloise<sup>a,b</sup>, Lorenzo Fassina<sup>c</sup>, Maria Letizia Focarete<sup>d</sup>, Nadia Lotti<sup>e,f</sup>, Livia Visai<sup>a,b</sup>

- a. Department of Molecular Medicine, Centre for Health Technologies (CHT), INSTM UdR of Pavia, University of Pavia, 27100 Pavia, Italy
- b. Medicina Clinica-Specialistica, UOR5 Laboratorio di Nanotecnologie, ICS Maugeri, IRCCS, 27100 Pavia, Italy
- c. Department of Electrical, Computer and Biomedical Engineering, Centre for Health Technologies (CHT), University of Pavia, 27100 Pavia, Italy
- d. Department of Chemistry "Giacomo Ciamician" and INSTM UdR of Bologna, University of Bologna, 40126 Bologna, Italy
- e. Civil, Chemical, Environmental and Materials Engineering Department, University of Bologna, 40131 Bologna, Italy
- f. Interdepartmental Center for Industrial Research on Advanced Applications in Mechanical Engineering and Materials Technology, CIRI-MAM, University of Bologna, 40131 Bologna, Italy

A)

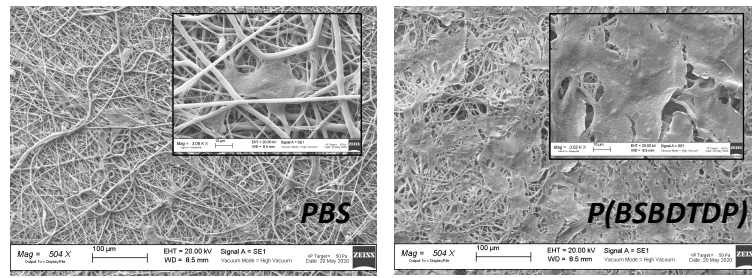

B)

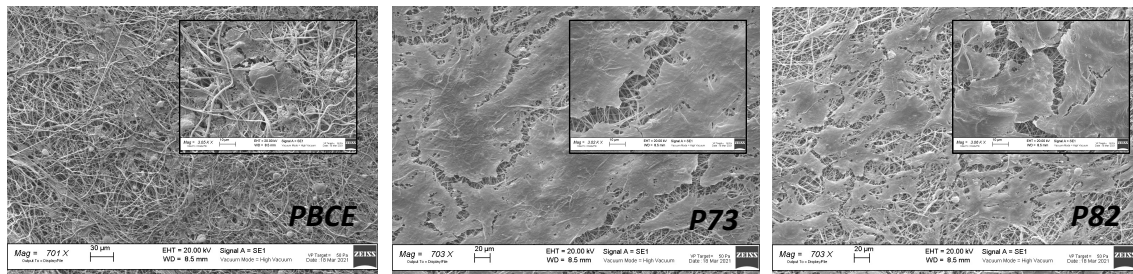

**Figure S1:** NIH-3T3 cell proliferation at 5 days of culture assessed by SEM on both group #1 and group #2. **(A)** Group #1: scale bar = 100 µm, magnification 500× (inset scale bar = 10 µm and magnification 3.0×). **(B)** Group #2: Scale bar = 30 µm and magnification 700× (inset scale bar = 10 µm and magnification 3.0×).
